# Supplementary material for: Hof1 plays a checkpoint-related role in MMS-induced DNA damage response in Candida albicans
Source: PubMed Central journal article supplement — Mol Biol Cell. 2020 Mar 1;31(5):348–59. doi: 10.1091/mbc.E19-06-0316 (PMC7183792; doi:10.1091/mbc.e19-06-0316), 2020-03-01
Supplement: mbc-31-348-s001.pdf [file mbc-31-348-s001.pdf]

# Supplemental Materials

*Molecular Biology of the Cell*

Feng et al.

## Supporting Information

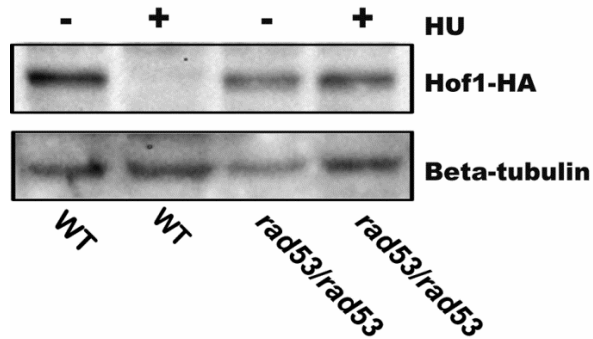

**Figure S1. Loss of *RAD53* stabilizes Hof1 levels in cells exposed to HU.** Hof1-HA levels in wild type (WT) and *rad53/rad53* strains were assessed by Western blot with an anti-HA antibody, with Beta tubulin used as a loading control. Cells were grown in YPD to log phase were either sampled (- HU) or treated with 40mM HU for 90 mins prior to harvesting (+ HU).

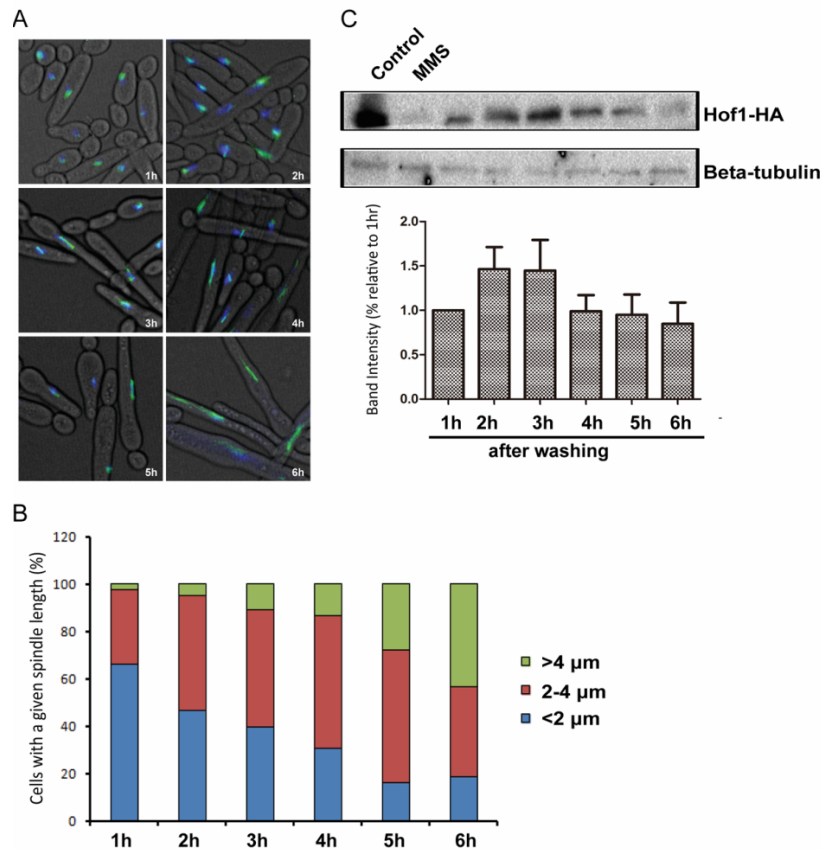

**Figure S2. Tracking the levels of Hof1 through the cell cycle in a population of synchronized cells, using spindle length as an indication of cell cycle progression.** Cells expressing Tub2-GFP and Hof1-HA were synchronized by exposure to 0.02% MMS for 6 h, washed, released into YPD and tracked through reinitiation of the cell cycle. (A) At the indicated time points cells were imaged for morphology (DIC, gray), nuclei (DAPI, blue) and spindles (Tub2-GFP, green). (B) The length of spindles in the images was also measured.  $\geq 80$  spindles/time. (C) Hof1-HA levels were assessed at the same time points by Western blot.

| Name              | Oligos                                                                                | Description                            |
|-------------------|---------------------------------------------------------------------------------------|----------------------------------------|
| P7                | ATCTCATTAGATTTGGAACCTGTGGGTT                                                          | CAS9 gene                              |
| P8                | TTCGAGCGTCCAAAACCTTCT                                                                 | CAS9 gene                              |
| P1                | AAGAAAGAAAGAAAACCAGGAGTGAA                                                            | sgRNA                                  |
| P4                | ACAAATATTTAACTCGGGACCTGG                                                              | sgRNA                                  |
| P5                | GCGGCCGCAAGTGATTAGACT                                                                 | sgRNA                                  |
| P6                | GCAGCTCAGTGATTAAGAGTAAAGATGG                                                          | sgRNA                                  |
| HOF1-sg-F         | ATTTGatagccaaataaacctgacaG                                                            | sgRNA for <i>HOF1</i>                  |
| HOF1-sg-R         | AAAACGTGCAGGTTTATTTGGCTATC                                                            | sgRNA for <i>HOF1</i>                  |
| HOF1-Re-F         | accctatttgaataacttttgggtaactccccagagaaaag<br>ttttgaaatcgtcacatccaatacctcgccagaac      | repair DNA for <i>HOF1</i>             |
| HOF1-Re-R         | AAGCATATTTGTTGGGAATGGTAGATCTAATGG<br>CAAGTGTCTTCTGTAAAAAGATGAAACTCACTATA<br>GGGAGACCG | repair DNA for <i>HOF1</i>             |
| HOF1-Te-F         | gcgagtatctaataccacaac                                                                 | genotype confirmation for <i>HOF1</i>  |
| HOF1-Te-R         | GAATGTGGGTCGGAAGAG                                                                    | genotype confirmation for <i>HOF1</i>  |
| HOF1-F            | CGGGGTACCGgacaacaacaatggaactgg                                                        | <i>HOF1</i> gene cloning               |
| HOF1-R            | CGGGGTACCGAATGTGGGTCGGAAGAG                                                           | <i>HOF1</i> gene cloning               |
| RAD23-sg-F        | aatggattagtttggtatcGTTTAGAGCTAGAAATAG<br>CAAGTTAAA                                    | sgRNA for <i>RAD23</i>                 |
| RAD23-sg-R        | GATAACCAAATAATCCATTCAAATTAATAATAGT<br>TTACGCAAGTC                                     | sgRNA for <i>RAD23</i>                 |
| RAD23-Re-F1       | tgtgtgtgtgcccgttc                                                                     | repair DNA for <i>RAD23</i>            |
| RAD23-Re-R1       | GTTCTGGCGAGGTATTGGACCTGTTGTTATTGTG<br>GAAGTC                                          | repair DNA for <i>RAD23</i>            |
| RAD23-Re-F2       | cggctcccctatagtgaggcttttcatcccgttc                                                    | repair DNA for <i>RAD23</i>            |
| RAD23-Re-R2       | CGGGGTACCATCTGGTTCAATAAAGGC                                                           | repair DNA for <i>RAD23</i>            |
| RAD23-Te-new<br>F | tagggtaggttctgtattg                                                                   | genotype confirmation for <i>RAD23</i> |
| RAD23-Te-new<br>R | TGACAACACTACAGCCAAAACAG                                                               | genotype confirmation for <i>RAD23</i> |
| SIZ1-sg-F         | gaattaaagacacttttcgGTTTAGAGCTAGAAATAG<br>CAAGTTAAA                                    | sgRNA for <i>SIZ1</i>                  |
| SIZ1-sg-R         | CGAAAAGTGTCTTTAAATCCAAATTAATAATAGT<br>TTACGCAAGTC                                     | sgRNA for <i>SIZ1</i>                  |
| SIZ1-Re-F1        | gatgtctgtcttcttga                                                                     | repair DNA for <i>SIZ1</i>             |
| SIZ1-Re-R1        | GTTCTGGCGAGGTATTGGAGTCCCCTGTAAACG<br>CAT                                              | repair DNA for <i>SIZ1</i>             |
| SIZ1-Re-F2        | cggctcccctatagtgaggtaactcgccaaggaagg                                                  | repair DNA for <i>SIZ1</i>             |
| SIZ1-Re-R2        | GCCTCTATCAGTTCAGCC                                                                    | repair DNA for <i>SIZ1</i>             |
| SIZ1-Te-F         | acgcgtcgacgttgacgaggcattgagat                                                         | genotype confirmation for <i>SIZ1</i>  |
| SIZ1-Te-R         | acgcgtcgacGATTACGCCATAGGAAGC                                                          | genotype confirmation for <i>SIZ1</i>  |
| Rad4-sg-F         | agaatcaggtaatgatacatGTTTAGAGCTAGAAATA<br>GCAAGTTAAA                                   | sgRNA for <i>RAD4</i>                  |
| Rad4-sg-R         | ATGTATCATTACCTGATTCTCAAATTAATAATAGTT<br>TACGCAAGTC                                    | sgRNA for <i>RAD4</i>                  |
| Rad4-Re-F         | cгааagctattgaatgatgtaataataagagaagaactgccact<br>gagaаagaagcgggatccaatacctcgccagaac    | repair DNA for <i>RAD4</i>             |
| Rad4-Re-R         | GTAACATCTATATTTCCATATTGATTTTAGGAAC<br>AATGCCATCAGTCACGGGTGGAGGCTCACTATAG<br>GGAGACCG  | repair DNA for <i>RAD4</i>             |
| Rad4-Te-F         | caatgagcaaccagagcc                                                                    | genotype confirmation for <i>RAD4</i>  |

|                |                                                                                |                                              |
|----------------|--------------------------------------------------------------------------------|----------------------------------------------|
| Rad4-Te-R      | GGTCTTCCTCCTCTTGTTCC                                                           | genotype confirmation for <i>RAD4</i>        |
| Rad52-sg-F     | aatttgctaataaatattGTTTTAGAGCTAGAAATAGCAAGTTAAA                                 | sgRNA for <i>RAD52</i>                       |
| Rad52-sg-R     | AATATTTTCATTAGCCAAATTCAAATTAATAATAGTTTACGCAAGTC                                | sgRNA for <i>RAD52</i>                       |
| Rad52-Re-F     | cagcaacctcaaccaaccaacagaggcttcctttcgaccagacgagtcacgagctcgtccaatacctcgcagaac    | repair DNA for <i>RAD52</i>                  |
| Rad52-Re-R     | CATAGCTGACCACTTTGGTTGGCAGTTTTGGTGTAAACAAAAGCTGCTGCATGGTGGGAACTCACTATAGGGAGACCG | repair DNA for <i>RAD52</i>                  |
| Rad52-Te-new F | acaaacccttccaccac                                                              | genotype confirmation for <i>RAD52</i>       |
| Rad52-Te-new R | ATCAACTGCCATAGACTCG                                                            | genotype confirmation for <i>RAD52</i>       |
| MMS22-sg-F     | actaaaaaaaaaggtatccaaGTTTTAGAGCTAGAAATAGCAAGTTAAA                              | sgRNA for <i>MMS22</i>                       |
| MMS22-sg-R     | TTGGATACCTTTTTTTTAGTCAAATTAATAATAGTTTACGCAAGTC                                 | sgRNA for <i>MMS22</i>                       |
| MMS22-Re-F     | tacctgaagaccaagaaaaagaaatcatttgcacatattgaaataccacgaactcatccaatacctcgcagaac     | repair DNA for <i>MMS22</i>                  |
| MMS22-Re-R     | TGTACCAGTAAAGCAATTGCATGAATCGTTCAAAAATGAATCATCAGGGATATCAAATCTCACTATAGGGAGACCG   | repair DNA for <i>MMS22</i>                  |
| MMS22-Te-F     | gacgattcagattcaaaccc                                                           | genotype confirmation for <i>MMS22</i>       |
| MMS22-Te-R     | CCACTTTACATACCAGCGC                                                            | genotype confirmation for <i>MMS22</i>       |
| Rad18-sg-F     | gcctcattattacgattatGTTTTAGAGCTAGAAATAGCAAGTTAAA                                | sgRNA for <i>RAD18</i>                       |
| Rad18-sg-R     | ATAATCGTAATAAATGAGGCCAAATTAATAATAGTTTACGCAAGTC                                 | sgRNA for <i>RAD18</i>                       |
| Rad18-Re-F1    | gctgtcgtaccatctgtc                                                             | repair DNA for <i>RAD18</i>                  |
| Rad18-Re-R1    | GTTCTGGCGAGGTATTGGAGCGGACATCTATTATCTCG                                         | repair DNA for <i>RAD18</i>                  |
| Rad18-Re-F2    | cggctccctatagtgaggaagagcagcgaagaggac                                           | repair DNA for <i>RAD18</i>                  |
| Rad18-Re-R2    | CTGGGGATGGAGATGAGAC                                                            | repair DNA for <i>RAD18</i>                  |
| Rad18-Te-F     | cgctcctcatcaatcac                                                              | genotype confirmation for <i>RAD18</i>       |
| Rad18-Te-R     | GCTTGCCCTTGGAAGTGG                                                             | genotype confirmation for <i>RAD18</i>       |
| Rad14-sg-F     | agatcgacagaatagactaGTTTTAGAGCTAGAAATAGCAAGTTAAA                                | sgRNA for <i>RAD14</i>                       |
| Rad14-sg-R     | TAGTCTATTCTGTTTCGATCTCAAATTAATAATAGTTTACGCAAGTC                                | sgRNA for <i>RAD14</i>                       |
| Rad14-Re-F1    | ctgacaaactaacacacg                                                             | repair DNA for <i>RAD14</i>                  |
| Rad14-Re-R1    | GTTCTGGCGAGGTATTGGATTGTCGTGGTGGTGGAGGTG                                        | repair DNA for <i>RAD14</i>                  |
| Rad14-Re-F2    | cggctccctatagtgagcgaatagagaaccaacc                                             | repair DNA for <i>RAD14</i>                  |
| Rad14-Re-R2    | TCACGGGCGAAGACCAATCA                                                           | repair DNA for <i>RAD14</i>                  |
| Rad14-Te-F     | gagtttgggtagtattggc                                                            | genotype confirmation for <i>RAD14</i>       |
| Rad14-Te-R     | CCACTTCTCTGTCTCAATACC                                                          | genotype confirmation for <i>RAD14</i>       |
| HOF1-Nsg-F     | tgaacaactcaataatgtGTTTTAGAGCTAGAAATAGCAAGTTAAA                                 | sgRNA for the N terminal of <i>HOF1</i>      |
| HOF1-Nsg-R     | ACATTATTTGAGTTGTTTCACAAATTAATAATAGTTTACGCAAGTC                                 | sgRNA for the N terminal of <i>HOF1</i>      |
| HOF1-N-ReF     | atgcgagtatctaaccacaactgtcaaaaaccctatttggatgaacttttgggtaactccggatcc             | repair DNA for the N terminal of <i>HOF1</i> |

|                         |                                                                                              |                                                           |
|-------------------------|----------------------------------------------------------------------------------------------|-----------------------------------------------------------|
| HOF1-N-ReR              | TCCAATCTCGTTGTAGATTCGTTTATTTCTTTGT<br>AATTTACTAATGCCATATGATAGTGGGATCCGGAG<br>TTACCCCAAAAAG   | repair DNA for the N terminal of<br><i>HOF1</i>           |
| HOF1-C-sg-F             | atagcgatgaagttgcaaaaGTTTtagagctagaaata<br>GCAAGTTAAA                                         | sgRNA for the C terminal of <i>HOF1</i>                   |
| HOF1-C-sg-R             | TTTGCCAACCTTCATCGCTATCAAATAAAAATAGT<br>TTACGCAAGTC                                           | sgRNA for the C terminal of <i>HOF1</i>                   |
| HOF1-C-re-F             | gatctaatagcaggtgtaatggagacgtaatcaatttagacg<br>atcattgagaatggaggatcc                          | repair DNA for the C terminal of<br><i>HOF1</i>           |
| HOF1-C-re-R             | TAAATCATCTCCTTCAACAATATAGTTGCCAGGAA<br>CTAAGCCAATCATACTGATGACTGGGATCCTCCA<br>TTTCTCAATG      | repair DNA for the C terminal of<br><i>HOF1</i>           |
| HOF1-tag-F              | tcatcaggtatgattggcttagttcctggcaactatattgtgaag<br>gagatgatttattcctgctgcaggtcgacggatc          | tag for <i>HOF1</i>                                       |
| HOF1-tag-SH3<br>F       | ccaaatcaacagtgccaagaagatcaataaaacttaccctcag<br>caacaaaaaccattgttTAGTAAGctgcaggtcgacggat<br>c | tag for C terminal of <i>HOF1</i>                         |
| Rad53-sg-F              | tatcaaaatccaccaaataatGTTTTAGAGCTAGAAATAG<br>CAAGTTAAA                                        | sgRNA for <i>RAD53</i>                                    |
| Rad53-sg-R              | ATATTTGGTGGATTTTGATACAAATAAAAATAGT<br>TTACGCAAGTC                                            | sgRNA for <i>RAD53</i>                                    |
| Rad53-TagF              | caaacctcagaagaaatgaatatttacccttatttcgggttta<br>agtagtataagttcagctgcaggtcgacggatc             | tag for Rad53                                             |
| Rad53-TagR              | AATCAAATATCCGATCCTATCCAAAAACAAATGTTT<br>CAGGACAAGTACATGGGTAAACTACTATAGGG<br>AGACCGGC         | tag for Rad53                                             |
| Rad53-TF                | ttgcttagaggaggggag                                                                           | genotype confirmation for <i>RAD53</i>                    |
| Rad53-TR                | ATGTGGAATCTCAACGACC                                                                          | genotype confirmation for <i>RAD53</i>                    |
| Rad53-Re-F              | ATGGAAGTAACACAACGGACGCAGAGTCAGACA<br>CAACCAACACAACAGTCACCGACAACCTTCCAATA<br>CCTCGCCAGAAC     | repair DNA for <i>RAD53</i>                               |
| Rad53-New-TF            | ACATTCAGTAACAACACCCT                                                                         | genotype confirmation for <i>RAD53</i>                    |
| sgRad53-prom<br>oter-F  | aaagattgttcaaaattgaGTTTTAGAGCTAGAAATAG<br>CAAGTTAAA                                          | sgRNA for the promoter of <i>RAD53</i>                    |
| sgRad53-prom<br>oter-R  | TCAATTTGAACAAATCTTCAAATAAAAATAGT<br>TTACGCAAGTC                                              | sgRNA for the promoter of <i>RAD53</i>                    |
| Rad53-promot<br>er-Re-F | gagctgtatatacatatagttatttacgaaatcgcatacgt<br>tagacgaataccggatcggtatgataaacggaac              | repair DNA for the promoter of<br><i>RAD53</i>            |
| Rad53-promot<br>er-Re-R | CTGAGTTGTCGGTGACTGTTGTGTTGGTTGTGTC<br>TGACTCTGCGTCCGTTGTGTTACTTCCATGTTTT<br>TGGGGAGGGTA      | repair DNA for the promoter of<br><i>RAD53</i>            |
| Rad53-promot<br>er-Te-F | cgcttatgccagtttcttc                                                                          | genotype confirmation for the<br>promoter of <i>RAD53</i> |
| Rad53-promot<br>er-Te-R | GCGTCCGTTGTGTTACTTCC                                                                         | genotype confirmation for the<br>promoter of <i>RAD53</i> |
| Tub2-GFP-F              | attgatgaagaagaattagaatgccgatgaaatcccattaga<br>agatgcccatggaaaagcttcgtacgctcgag               | construct Tub2-GFP strain                                 |
| Tub2-GFP-R              | GTATATTACATATACATATTCTTATTATTAACATT<br>AATCACCCCTTATATTAACAAGCTCACTATAGGG<br>AGACCG          | construct Tub2-GFP strain                                 |

| Strains | Genotype                                                                                          | Source      |
|---------|---------------------------------------------------------------------------------------------------|-------------|
| SN148   | <i>arg4/arg4 leu2/leu2 his1/his1</i><br><i>ura3::imm434/ura3::imm434 iro1::imm434/iro1::imm43</i> | Lab stock   |
| JR7     | RM1000 <i>pph3::hisG/pph3::HIS1</i>                                                               | Feng, 2013  |
|         | <i>mms21::HIS1/mms21::URA3</i>                                                                    | Islam, 2019 |
| JC1     | <i>hof1::HIS1/hof1::HIS1</i>                                                                      | This study  |
| JC2     | <i>SN148 +CIP10</i>                                                                               | This study  |
| JC3     | <i>hof1::HIS1/hof1::HIS1 +CIP10</i>                                                               | This study  |
| JC4     | <i>hof1::HIS1/hof1::HIS1 +CIP10-HOF1</i>                                                          | This study  |
| JC5     | <i>Hof1::myc-URA3/Hof1::myc-URA3</i>                                                              | This study  |
| JC6     | <i>Hof1-N<sup>Δ</sup>/Hof1-N<sup>Δ</sup></i>                                                      | This study  |
| JC7     | <i>Hof1-SH3<sup>Δ</sup>/Hof1-SH3<sup>Δ</sup></i>                                                  | This study  |
| JC8     | <i>Hof1-N<sup>Δ</sup>-myc/Hof1-N<sup>Δ</sup>-myc</i>                                              | This study  |
| JC9     | <i>rad14::ARG4/rad14::ARG4</i>                                                                    | This study  |
| JC10    | <i>hof1::HIS1/hof1::HIS1 rad14::ARG4/rad14::ARG4</i>                                              | This study  |
| JC11    | <i>hof1::HIS1/hof1::HIS1 mms21::HIS1/mms21::URA3</i>                                              | This study  |
| JC12    | <i>hof1::URA3/hof1::URA3 pph3::HIS1/pph3::hisG</i>                                                | This study  |
| JC13    | <i>rad52::ARG4/rad52::ARG4</i>                                                                    | This study  |
| JC14    | <i>hof1::HIS1/hof1::HIS1 rad52::ARG4/rad52::ARG4</i>                                              | This study  |
| JC15    | <i>siz1::ARG4/siz1::ARG4</i>                                                                      | This study  |
| JC16    | <i>hof1::HIS1/hof1::HIS1 siz1::ARG4/siz1::ARG4</i>                                                | This study  |
| JC17    | <i>mms22::ARG4/mms22::ARG4</i>                                                                    | This study  |
| JC18    | <i>hof1::HIS1/hof1::HIS1 mms22::ARG4/mms22::ARG4</i>                                              | This study  |
| JC19    | <i>rad4::ARG4/rad4::ARG4</i>                                                                      | This study  |
| JC20    | <i>hof1::HIS1/hof1::HIS1 rad4::ARG4/rad4::ARG4</i>                                                | This study  |
| JC21    | <i>rad18::ARG4/rad18::ARG4</i>                                                                    | This study  |
| JC22    | <i>hof1::HIS1/hof1::HIS1 rad18::ARG4/rad18::ARG4</i>                                              | This study  |
| JC23    | <i>rad53::HIS1/rad53::HIS1</i>                                                                    | This study  |
| JC24    | <i>rad53::HIS1/rad53::HIS1 hof1::ARG4/hof1::ARG4</i>                                              | This study  |
| JC25    | <i>Hof1::HA-HIS1/Hof1::HA-HIS1</i>                                                                | This study  |
| JC26    | <i>rad23::ARG4/rad23::ARG4</i>                                                                    | This study  |
| JC27    | <i>hof1::HIS1/hof1::HIS1 rad23::ARG4/rad23::ARG4</i>                                              | This study  |
| JC28    | <i>hof1::HIS1/hof1::HIS1</i>                                                                      | This study  |
| JC29    | <i>rad53::HIS1/rad53::HIS1 Hof1::HA-HIS1/Hof1::HA-HIS1</i>                                        | This study  |

|      |                                                                               |            |
|------|-------------------------------------------------------------------------------|------------|
| JC30 | <i>RAD53/rad53::HA-HIS1</i>                                                   | This study |
| JC31 | <i>hof1::HIS1/hof1::HIS1 RAD53/rad53::HA-ARG4</i>                             | This study |
| JC32 | <i>rad23::ARG4/rad23::ARG4 RAD53/rad53::HA-HIS1</i>                           | This study |
| JC33 | <i>mms21::HIS1/mms21::URA3 RAD53/rad53::HA-ARG4</i>                           | This study |
| JC34 | <i>hof1::HIS1/hof1::HIS1 rad23::ARG4/rad23::ARG4<br/>RAD53/rad53::HA-URA3</i> | This study |
| JC35 | <i>hof1::HIS1/hof1::HIS1 RAD53/pMET3-RAD53</i>                                | This study |
| JC36 | <i>Hof1::HA-HIS1/Hof1::HA-HIS1 TUB2/Tub2::GFP-URA3</i>                        | This study |
